# Supplementary material for: Carbonic Anhydrase Generates CO2 and H+ That Drive Spider Silk Formation Via Opposite Effects on the Terminal Domains
Source: PubMed Central journal article supplement (PMC4122339; doi:10.1371/journal.pbio.1001921), 2014-08-05
Supplement: pbio.1001921.s002.pdf [file pbio.1001921.s002.pdf]

**Table S2.** NMR and refinement statistics for protein structures

| <i>A. ventricosus</i> MiSp CT                |                     |
|----------------------------------------------|---------------------|
| <b>NMR distance and dihedral constraints</b> |                     |
| Distance constraints                         |                     |
| Total NOE                                    | 6060                |
| Intra-residue                                | 1024                |
| Inter-residue                                | 5036                |
| Sequential ( $ i-j  = 1$ )                   | 1548                |
| Medium-range ( $ i-j  < 4$ )                 | 1815                |
| Long-range ( $ i-j  > 5$ )                   | 971                 |
| Intermolecular                               | 702                 |
| <b>Structure statistics</b>                  |                     |
| Violations (mean and s.d.)                   |                     |
| Distance constraints (Å)                     | $0.0109 \pm 0.0004$ |
| Max. distance constraint violation (Å)       | $0.38 \pm 0.05$     |
| Deviations from idealized geometry           |                     |
| Bond lengths (Å)                             | $0.0035 \pm 0.0001$ |
| Bond angles (°)                              | $0.440 \pm 0.007$   |
| Improper (°)                                 | $1.241 \pm 0.043$   |
| Average pairwise r.m.s.d.** (Å)              |                     |
| Heavy                                        | $0.46 \pm 0.07$     |
| Backbone                                     | $0.78 \pm 0.07$     |

\*\*Pairwise r.m.s.d. was calculated for residues 20-120 of both chains among 20 refined structures.
